# Supplementary material for: Effect of provision of home-based curative health services by public sector health-care providers on neonatal survival: a community-based cluster-randomised trial in rural Pakistan
Source: PubMed Central journal article supplement (PMC5762815; doi:10.1016/s2214-109x(17)30248-6), 2017-07-14
Supplement: mmc1.pdf [file mmc1.pdf]

# THE LANCET

## Global Health

### Supplementary appendix

This appendix formed part of the original submission and has been peer reviewed. We post it as supplied by the authors.

Supplement to: Soofi S, Cousens S, Turab A, et al. Effect of provision of home-based curative health services by public sector health-care providers on neonatal survival: a community-based cluster-randomised trial in rural Pakistan. *Lancet Glob Health* 2017; **5**: e796–806.

**Web Appendix**

**Web figures (page 2-5)**

**Web Tables (page 6-12)**

Web Figure 1

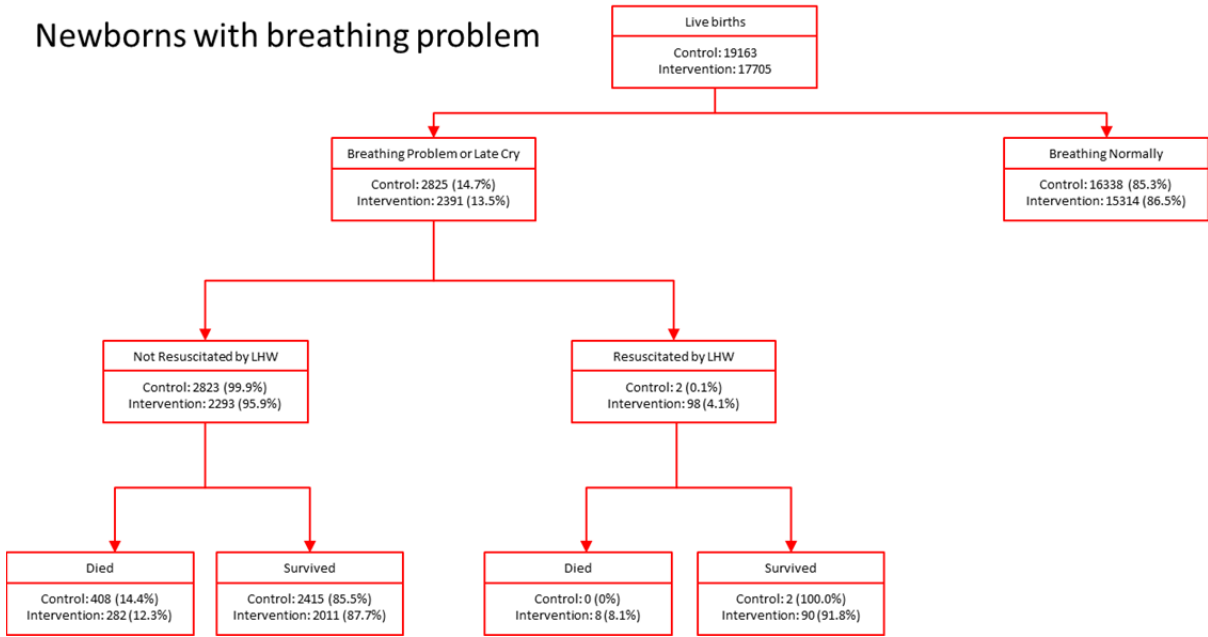

Web Figure 2

Neonates with possible infection

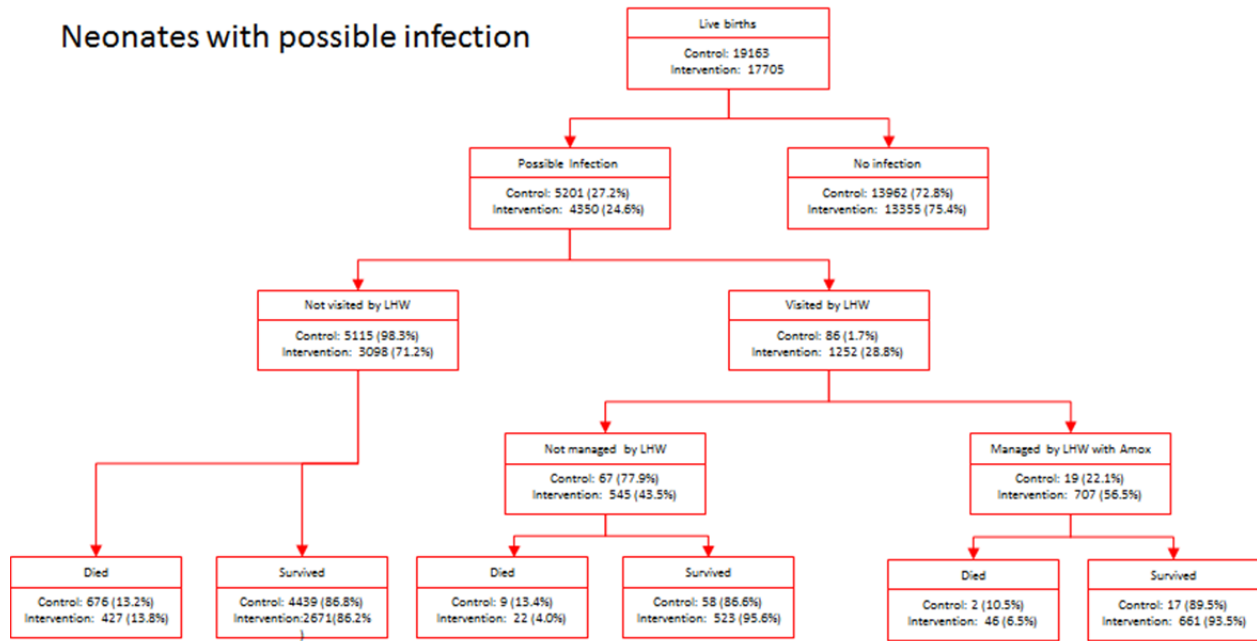

Web Figure 3

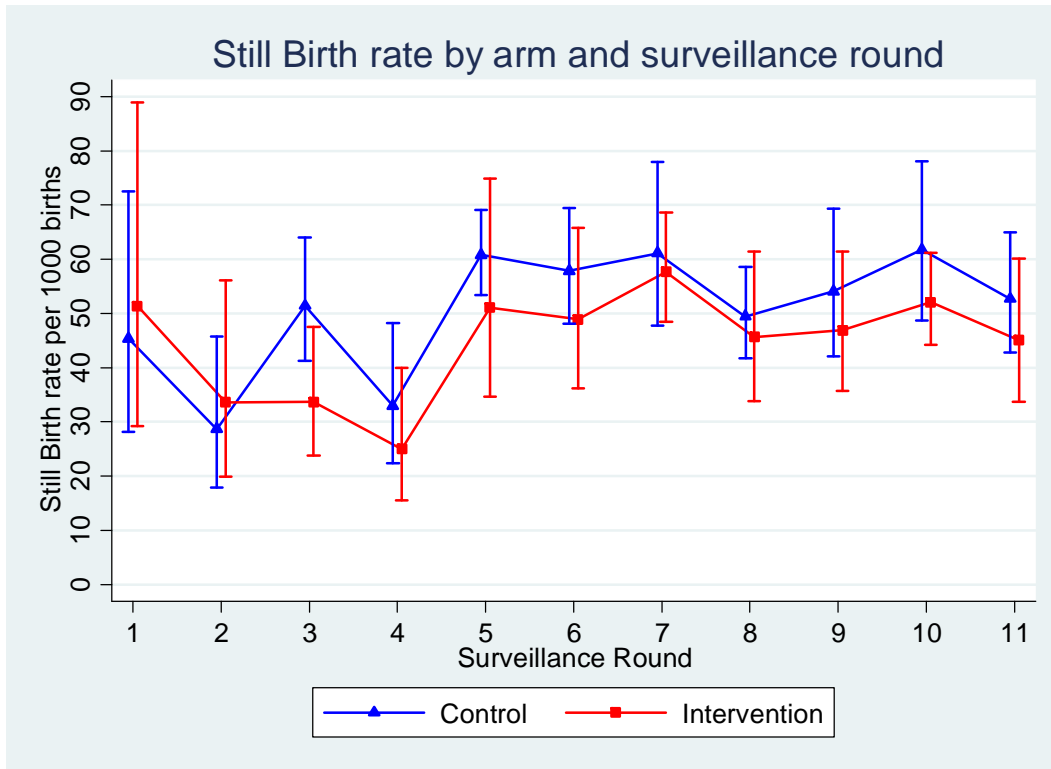

Web Figure 4

Neonatal Mortality Rate by arm and surveillance round

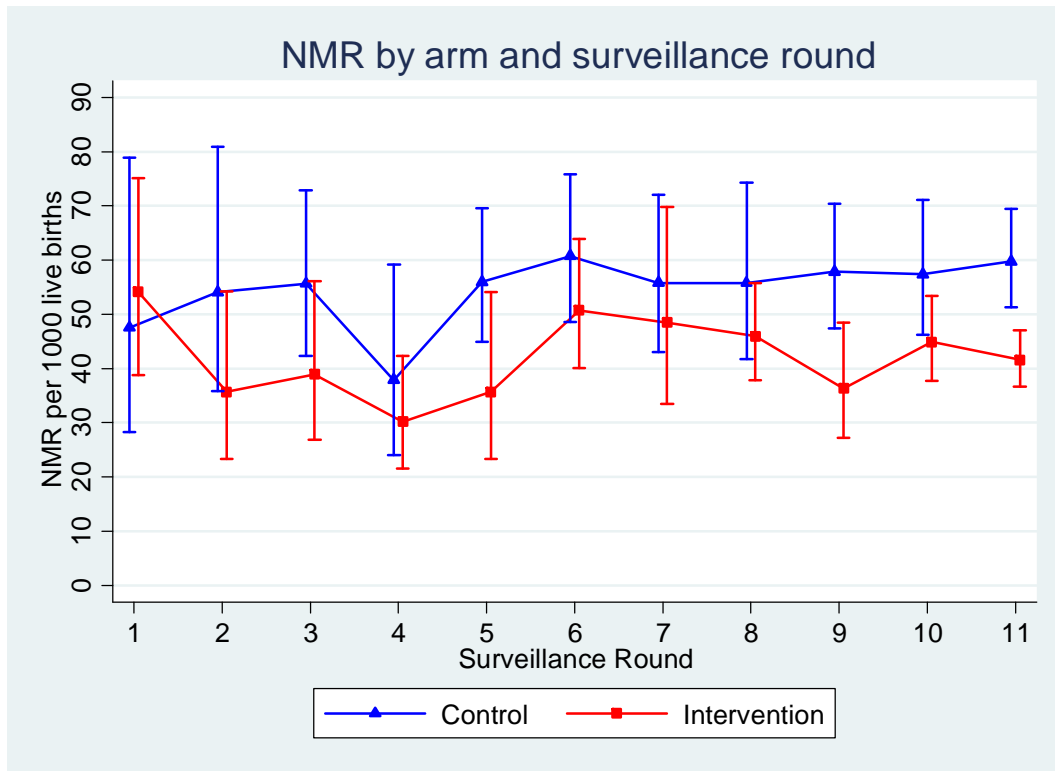

**Web Table 1**

**Causes of Still births at Baseline**

| Cause of Still Birth                                | Control (n=318) |                             | Intervention (n=289) |                             |
|-----------------------------------------------------|-----------------|-----------------------------|----------------------|-----------------------------|
|                                                     | n               | Cause Specific NMR (95% ci) | n                    | Cause Specific NMR (95% ci) |
| Congenital malformations                            | 12              | 1.4 (0.6-2.2)               | 13                   | 1.6 (0.7-2.5)               |
| Pregnancy-induced hypertension                      | 98              | 11.6 (9.3-13.9)             | 89                   | 10.0 (8.7-13.3)             |
| Antepartum haemorrhage                              | 25              | 29.5 (18.0-41.1)            | 28                   | 34.6 (21.8-47.4)            |
| Maternal infections that can affect the foetus      | 21              | 2.5 (1.4-3.5)               | 17                   | 2.1 (11.0-40.0)             |
| Obstructed labour & Other obstetric complications   | 36              | 42.5 (28.7-56.4)            | 40                   | 49.4 (34.1-64.7)            |
| Other Causes                                        | 21              | 2.5 (1.4-3.5)               | 20                   | 2.5 (1.4-3.5)               |
| Cause not possible to determine from verbal autopsy | 105             |                             | 82                   |                             |

**Web Table 2**  
**Cause Specific Neonatal Mortality at Baseline**

| Cause of Death                             | Control (n=329) |                             | Intervention (n=306) |                             |
|--------------------------------------------|-----------------|-----------------------------|----------------------|-----------------------------|
|                                            | n               | Cause Specific NMR (95% ci) | n                    | Cause Specific NMR (95% ci) |
| Preterm birth complications                | 63              | 7.8 (5.8-9.7)               | 61                   | 7.9 (5.9-9.8)               |
| Intrapartum complications (Birth asphyxia) | 139             | 17.2 (14.3-20.0)            | 133                  | 17.1 (14.2-20.0)            |
| Neonatal Infections                        | 103             | 12.7 (10.3-15.2)            | 95                   | 12.3 (9.7-14.7)             |
| Neonatal pneumonia                         | 12              | --                          | 10                   | --                          |
| Neonatal sepsis/Meningitis                 | 80              | --                          | 75                   | --                          |
| Neonatal tetanus                           | 2               | --                          | 3                    | --                          |
| Neonatal diarrhoea                         | 2 (0.6)         | --                          | 4 (1.3)              | --                          |
| Congenital malformations                   | 9               | 1.1 (0.3-1.8)               | 7                    | 0.9 (0.2-1.5)               |
| Accidents/Injuries                         | 2               | --                          | 1                    | --                          |
| Other specific perinatal causes            | 7               | --                          | 3                    | --                          |
| Cause not possible to determine from VA    | 13              | --                          | 9                    | --                          |



**Webappendix Table 3**

**Cluster level summary analysis for birth outcomes**

| Measure                  | GEE with round (as currently reported) |            |          | GEE without round |            |          | Cluster-level summary analysis (weighted by cluster size)                                                                                     |            |         |
|--------------------------|----------------------------------------|------------|----------|-------------------|------------|----------|-----------------------------------------------------------------------------------------------------------------------------------------------|------------|---------|
|                          | RR                                     | 95% c.i.   | P-value  | RR                | 95% c.i.   | P-value  | RR                                                                                                                                            | 95% c.i.   | P-value |
| Early fetal death        | 0.97                                   | 0.88, 1.08 | P=0.60   | 0.97              | 0.87, 1.08 | P=0.58   | 0.98                                                                                                                                          | 0.88, 1.10 | P=0.80  |
| Stillbirth               | 0.89                                   | 0.76, 1.04 | P=0.13   | 0.89              | 0.76, 1.04 | P=0.14   | 0.83                                                                                                                                          | 0.71, 0.98 | P=0.04  |
| Early neonatal mortality | 0.79                                   | 0.67, 0.93 | P=0.006  | 0.79              | 0.69, 0.93 | P=0.005  | 0.77                                                                                                                                          | 0.63, 0.94 | P=0.02  |
| Late neonatal mortality  | 0.72                                   | 0.62, 0.85 | P=0.0001 | 0.73              | 0.62, 0.86 | P=0.0001 | Number of late deaths very small in many clusters with several clusters having 0 deaths at either baseline or endline, preventing taking logs |            |         |
| Neonatal mortality       | 0.80                                   | 0.68, 0.93 | P=0.005  | 0.80              | 0.68, 0.94 | P=0.005  | 0.77                                                                                                                                          | 0.64, 0.93 | P=0.01  |
| Perinatal mortality      | 0.86                                   | 0.75, 0.98 | P=0.03   | 0.85              | 0.74, 0.98 | P=0.03   | 0.80                                                                                                                                          | 0.69, 0.93 | P=0.009 |

**Web Table 4**  
**Cause Specific Neonatal Mortality during Surveillance Rounds**

| Cause of Death                          | Control (n=934) |                                          | Intervention (n=653) |                                          | Cause Specific Mortality risk Ratio* (95% CI) | P values |
|-----------------------------------------|-----------------|------------------------------------------|----------------------|------------------------------------------|-----------------------------------------------|----------|
|                                         | n               | Cause Specific NMR <sup>†</sup> (95% ci) | n                    | Cause Specific NMR <sup>†</sup> (95% ci) |                                               |          |
| Preterm birth complications             | 180             | 9.4 (7.4-11.4)                           | 133                  | 7.5 (6.3-8.7)                            | 0.82 (0.67-1.01)                              | 0.066    |
| Perinatal asphyxia                      | 394             | 20.6 (17.1-24.0)                         | 257                  | 14.5 (9.6-19.5)                          | 0.81 (0.62-1.11)                              | 0.10     |
| Neonatal Infections                     | 286             | 14.9 (12.2-17.6)                         | 214                  | 12.1 (9.0-15.1)                          | 0.79 (0.60-1.05)                              | 0.11     |
| <i>Neonatal pneumonia</i>               | 37              | --                                       | 34                   | --                                       | --                                            |          |
| <i>Neonatal sepsis/Meningitis</i>       | 248             | --                                       | 176                  | --                                       | --                                            |          |
| <i>Neonatal tetanus</i>                 | 1               | --                                       | 2                    | --                                       | --                                            |          |
| <i>Neonatal diarrhea</i>                | 0               | --                                       | 2                    | --                                       | --                                            |          |
| Congenital malformations**              | 23              | 1.2 (0.7-1.7)                            | 17                   | 1.0 (0.4-1.5)                            | 0.81 (0.43-1.55)                              | 0.53     |
| Other specific perinatal causes**       | 17              | 0.9 (0.4-1.4)                            | 12                   | 0.7 (0.4-1.0)                            | 0.88 (0.49-1.60)                              | 0.69     |
| Cause not possible to determine from VA | 34              | --                                       | 20                   | --                                       | --                                            |          |

<sup>†</sup> Cause Specific deaths per 1000 live births

\* Estimated using generalised estimating equations, controlling for baseline mortality, randomisation stratum and surveillance round

\*\* Estimated using generalised estimating equations, controlling for baseline mortality and randomisation stratum

**Web Table 5**  
**Causes of Still Births identified during Trial from Surveillance**

| Cause of Still Birth                                | Control (n=925) |                                          | Intervention (n=710) |                                          | Cause Specific Mortality risk Ratio* (95% CI) | P values |
|-----------------------------------------------------|-----------------|------------------------------------------|----------------------|------------------------------------------|-----------------------------------------------|----------|
|                                                     | n               | Cause Specific NMR <sup>†</sup> (95% ci) | n                    | Cause Specific NMR <sup>†</sup> (95% ci) |                                               |          |
| Congenital malformations**                          | 30              | 1.5 (1.0-2.0)                            | 24                   | 1.3 (0.8-1.8)                            | 0.93 (0.61-1.42)                              | 0.75     |
| Pregnancy-induced hypertension                      | 277             | 13.7 (11.4-16.0)                         | 221                  | 11.9 (8.8-15.0)                          | 0.87 (0.68-1.12)                              | 0.28     |
| Antepartum haemorrhage**                            | 66              | 3.3 (2.5-4.0)                            | 65                   | 3.5 (2.8-4.2)                            | 1.19 (0.99-1.44)                              | 0.06     |
| Maternal infections that can affect the foetus      | 74              | 3.6 (2.3-5.0)                            | 44                   | 2.4 (1.8-2.9)                            | 0.69 (0.47-1.01)                              | 0.06     |
| Obstructed labour & Other obstetric complications   | 156             | 7.7 (5.5-9.9)                            | 95                   | 5.1 (3.7-6.5)                            | 0.65 (0.49-0.86)                              | 0.003    |
| Other Causes**                                      | 34              | 1.7 (1.2-2.1)                            | 25                   | 1.3 (0.5-2.1)                            | 0.78 (0.46-1.37)                              | 0.40     |
| Cause not possible to determine from verbal autopsy | 288             |                                          | 236                  |                                          |                                               |          |

<sup>†</sup> Cause Specific deaths per 1000 births

\* Estimated using generalised estimating equations, controlling for baseline mortality, randomisation stratum and surveillance round

\*\* Estimated using generalised estimating equations, controlling for baseline mortality and randomisation stratum

Web Table 6

Post intervention Birthing practices and Neonatal Morbidity in the intervention clusters (with the additional analysis restricted to functional LHWs and their catchment households only)  
(Excluding uncovered areas of Intervention ARM)

|                                                                   | Control clusters |       | Intervention clusters |       | OR (95% c.i); p-value            |
|-------------------------------------------------------------------|------------------|-------|-----------------------|-------|----------------------------------|
|                                                                   | n/N              | %     | n/N                   | %     |                                  |
| Home Births                                                       | 5265/11262       | 46.7% | 4847 /10248           | 47.3% | 1.03 (0.82,1.30); P=0.78         |
| Facility births                                                   | 5997/11262       | 53.2% | 5401/10248            | 52.7% | 0.97 (0.77,1.21); P=0.78         |
| Skilled birth attendant                                           | 6240/11262       | 55.4% | 5512/10248            | 53.8% | 0.92 (0.74, 1.16); P=0.51        |
| Presence of LHW at deliveries conducted by TBAs                   | 55/5022          | 1.1%  | 1020/4736             | 21.5% | 25.20 (15.48, 41.01); P<0.0001   |
| Instrumental deliveries                                           | 1879/11262       | 16.7% | 1730/10248            | 16.9% | 1.01 (0.82, 1.23); P=0.95        |
| Use of CDK at home births                                         | 957/4492         | 21.3% | 2983/4385             | 68.0% | 9.97 (4.70, 21.15);P<0.0001      |
| LHW postnatal visits                                              | 268/10496        | 2.5%  | 4431/9719             | 45.6% | 33.57 (19.98, 56.42); P<0.0001   |
| LHW early postnatal visits                                        | 185/10496        | 1.8%  | 3685/9719             | 37.9% | 35.62 (21.81, 58.17); P<0.0001   |
| Newborns with reported breathing problem or delayed cry at birth  | 1584/10801       | 14.7% | 1342/9941             | 13.5% | 0.90 (0.73, 1.12); P=0.35        |
| Newborns with breathing problem resuscitated by LHW               | 1/1584           | 0.1%  | 83/1342               | 6.1%  | 110.06 (20.79, 582.73); P<0.0001 |
| Low birth weight births                                           | 547/5774         | 9.5%  | 553/5992              | 9.2%  | 0.97 (0.77, 1.22); P=0.80        |
| Neonates with reported illness                                    | 3747/10801       | 34.7% | 3071/9941             | 30.9% | 0.83 (0.63, 1.11); P=0.22        |
| Care seeking for neonates with reported illness                   | 3464/3747        | 92.5% | 2844/3071             | 92.6% | 1.06 (0.76, 1.47); P=0.72        |
| Sick neonates visited by LHW                                      | 101/3747         | 2.7%  | 1269/3071             | 41.3% | 25.12 (15.42, 40.93); P<0.0001   |
| Neonates with possible infection                                  | 2928/10801       | 27.1% | 2446/9941             | 24.6% | 0.88 (0.67, 1.15); P=0.36        |
| Neonates with possible infection seen by LHW                      | 85/2928          | 2.9%  | 1011/2446             | 41.3% | 23.46 (15.07, 36.52); P<0.0001   |
| Neonates with possible infection managed by LHW using Amoxicillin | 19/2928          | 0.6%  | 568/2446              | 23.2% | 45.56 (22.31, 93.04); P<0.0001   |

LHW=Lady health worker

**Web Table 7**

**Summary birth outcomes from the quarterly surveillance (rounds 1-11) (with the additional analysis restricted to functional LHWs and their catchment households only)  
(Excluding uncovered areas of Intervention ARM)**

|                                 | <b>Control Clusters</b> | <b>Intervention clusters</b> | <b>Mortality risk Ratio* (95% CI)</b> | <b>p-value</b> |
|---------------------------------|-------------------------|------------------------------|---------------------------------------|----------------|
| Early Pregnancy Loss            |                         |                              |                                       |                |
| Number                          | 746                     | 642                          |                                       |                |
| Rate per 1000 known pregnancies | 62                      | 59                           | 0.96 (0.86, 1.07)                     | 0.50           |
| Still Births                    |                         |                              |                                       |                |
| Number                          | 608                     | 427                          |                                       |                |
| Rate per 1000 total births      | 53                      | 41                           | 0.79 (0.64, 0.97)                     | 0.024          |
| Early Neonatal mortality        |                         |                              |                                       |                |
| Number                          | 481                     | 329                          |                                       |                |
| Rate per 1000 live births       | 44                      | 33                           | 0.80 (0.64, 1.00)                     | 0.053          |
| Late Neonatal mortality         |                         |                              |                                       |                |
| Number                          | 103                     | 58                           |                                       |                |
| Rate per 1000 live births       | 10                      | 6                            | 0.57 (0.40, 0.81)                     | 0.002          |
| Neonatal mortality              |                         |                              |                                       |                |
| Number                          | 584                     | 387                          |                                       |                |
| Rate per 1000 live births       | 54                      | 39                           | 0.78 (0.62, 0.99)                     | 0.040          |
| Perinatal mortality             |                         |                              |                                       |                |
| Number                          | 1089                    | 756                          |                                       |                |
| Rate per 1000 total births      | 95                      | 73                           | 0.81 (0.65, 0.99)                     | 0.044          |

\* Estimated using generalised estimating equations, controlling for baseline mortality, randomisation stratum and surveillance round.

Web Table 8

Post intervention Birthing practices and Neonatal Morbidity in the intervention clusters  
(Restricted analysis Comparing Overall Intervention Clusters with just LHW Covered Intervention Clusters)

|                                                                   | Overall Intervention Clusters |       | LHW Covered Intervention Clusters |       | OR (95% c.i); p-value       |
|-------------------------------------------------------------------|-------------------------------|-------|-----------------------------------|-------|-----------------------------|
|                                                                   | n/N                           | %     | n/N                               | %     |                             |
| Home Births                                                       | 8627/18325                    | 47.1% | 4847/10248                        | 47.3% | 1.01 (0.95,1.08); P=0.71    |
| Facility births                                                   | 9698/18325                    | 52.9% | 5401/10248                        | 52.7% | 0.99 (0.93, 1.05); P=0.71   |
| Skilled birth attendant                                           | 9900/18325                    | 54.0% | 5512/10248                        | 53.8% | 0.99 (0.93, 1.05); P=0.67   |
| Presence of LHW at deliveries conducted by TBAs                   | 1184/8425                     | 14.1% | 1020/4736                         | 21.5% | 1.66 (1.40, 1.96); P<0.0001 |
| Instrumental deliveries                                           | 3008/18325                    | 16.4% | 1780/10248                        | 16.9% | 1.03 (0.92, 1.14); P=0.64   |
| Use of CDK at home births                                         | 4236/7698                     | 55.0% | 2983/4385                         | 68.0% | 1.75 (1.50, 2.05);P<0.0001  |
| LHW postnatal visits                                              | 5256/17288                    | 30.4% | 4431/9719                         | 45.6% | 1.95 (1.62, 2.33); P<0.0001 |
| LHW early postnatal visits                                        | 4318/17288                    | 25.0% | 3685/9719                         | 37.9% | 1.86 (1.56, 2.21); P<0.0001 |
| Newborns with reported breathing problem or delayed cry at birth  | 2391/17705                    | 13.5% | 1342/9941                         | 13.5% | 1.00 (0.96, 1.04); P=0.96   |
| Newborns with breathing problem resuscitated by LHW               | 98/2391                       | 4.1%  | 83/1342                           | 6.2%  | 1.53 (1.21, 1.93); P<0.0001 |
| Low birth weight births                                           | 933/10125                     | 9.2%  | 553/5992                          | 9.2%  | 1.00 (0.95 1.05); P=0.88    |
| Neonates with reported illness                                    | 5439/17705                    | 30.7% | 3071/9941                         | 30.9% | 1.00 (0.95, 1.05); P=0.99   |
| Care seeking for neonates with reported illness                   | 5037/5439                     | 92.6% | 2844/3071                         | 92.6% | 1.01 (0.93, 1.09); P=0.88   |
| Sick neonates visited by LHW                                      | 1566/5439                     | 28.8% | 1269/3071                         | 41.3% | 1.74 (1.47, 2.06); P<0.0001 |
| Neonates with possible infection                                  | 4350/17705                    | 24.6% | 2446/9941                         | 24.6% | 1.00 (0.95, 1.04); P=0.84   |
| Neonates with possible infection seen by LHW                      | 1252/4350                     | 28.8% | 1011/2446                         | 41.3% | 1.74 (1.48, 2.04); P<0.0001 |
| Neonates with possible infection managed by LHW using Amoxicillin | 707/4350                      | 16.6% | 568/2446                          | 23.2% | 1.55 (1.34, 1.78); P<0.0001 |

**Web Table 9**

**Summary birth outcomes from the quarterly surveillance (rounds 1-11)**  
**(Restricted analysis Comparing Overall Intervention Clusters with just LHW Covered Intervention Clusters)**

|                                 | Intervention clusters | LHW Covered Intervention clusters | Mortality risk Ratio* (95% CI) | p-value |
|---------------------------------|-----------------------|-----------------------------------|--------------------------------|---------|
| Early Pregnancy Loss            |                       |                                   |                                |         |
| Number                          | 1191                  | 642                               |                                |         |
| Rate per 1000 known pregnancies | 61                    | 59                                | 0.97 (0.91, 1.02)              | 0.25    |
| Still Births                    |                       |                                   |                                |         |
| Number                          | 830                   | 427                               |                                |         |
| Rate per 1000 total births      | 45                    | 41                                | 0.92 (0.85, 1.00)              | 0.05    |
| Early Neonatal mortality        |                       |                                   |                                |         |
| Number                          | 610                   | 329                               |                                |         |
| Rate per 1000 live births       | 35                    | 33                                | 0.95 (0.85, 1.05)              | 0.33    |
| Late Neonatal mortality         |                       |                                   |                                |         |
| Number                          | 126                   | 58                                |                                |         |
| Rate per 1000 live births       | 7                     | 6                                 | 0.84 (0.64, 1.11)              | 0.22    |
| Neonatal mortality              |                       |                                   |                                |         |
| Number                          | 736                   | 387                               |                                |         |
| Rate per 1000 live births       | 42                    | 39                                | 0.92 (0.82, 1.03)              | 0.13    |
| Perinatal mortality             |                       |                                   |                                |         |
| Number                          | 1440                  | 756                               |                                |         |
| Rate per 1000 total births      | 78                    | 73                                | 0.92 (0.85, 1.00)              | 0.06    |

\* Estimated using generalised estimating equations, controlling for baseline mortality, randomisation stratum and surveillance round.
